# Supplementary material for: Facile Fabrication of Wood-Derived Porous Fe3C/Nitrogen-Doped Carbon Membrane for Colorimetric Sensing of Ascorbic Acid
Source: MDPI journal article supplement (doi:10.3390/nano13202786), 2023-10-18
Supplement: s1 [file s1]

# Supplementary Information

## Facile fabrication of wood-derived porous Fe<sub>3</sub>C/nitrogen-doped carbon membrane for colorimetric sensing of ascorbic acid

*Sadaf Saeedi Garakani 1, Miao Zhang 1, Dongjiu Xie 2, Anirban Sikdar 1, Kanglei Pang 1 and  
Jiayin Yuan 1,\**

*1 Department of Materials and Environmental Chemistry, Stockholm University, 10691  
Stockholm, Sweden*

*2 Department for Electrochemical Energy Storage, Helmholtz-Zentrum Berlin für  
Materialien und Energie, Hahn-Meitner Platz 1, 14109 Berlin, Germany*

*\* Correspondence: [jiayin.yuan@mmk.su.se](mailto:jiayin.yuan@mmk.su.se)*

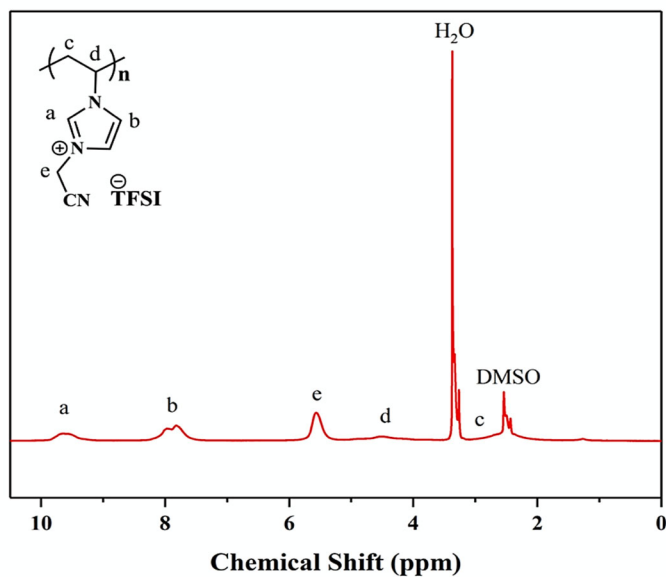

**Figure S1**  $^1\text{H}$ -NMR of the PIL poly(1-cyanomethyl-3-vinylimidazolium bis(trifluoromethane sulfonyl)imide) (PCMVIImTFSI), which was used for the porous membrane fabrication. NMR solvent:  $\text{DMSO-}d_6$ .

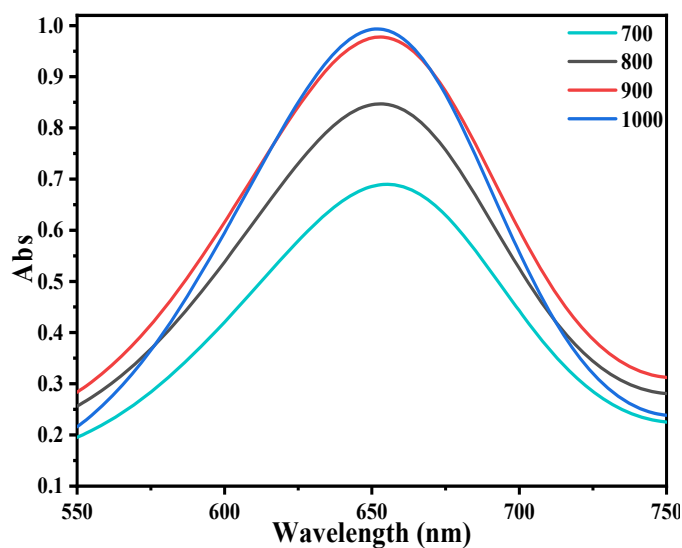

**Figure S2** UV-Vis absorbance spectra of the ox-TMB recorded in three systems (TMB +  $\text{H}_2\text{O}_2$  + Cat) prepared at different carbonization temperature, in acetate buffer solution at pH of 4.0.

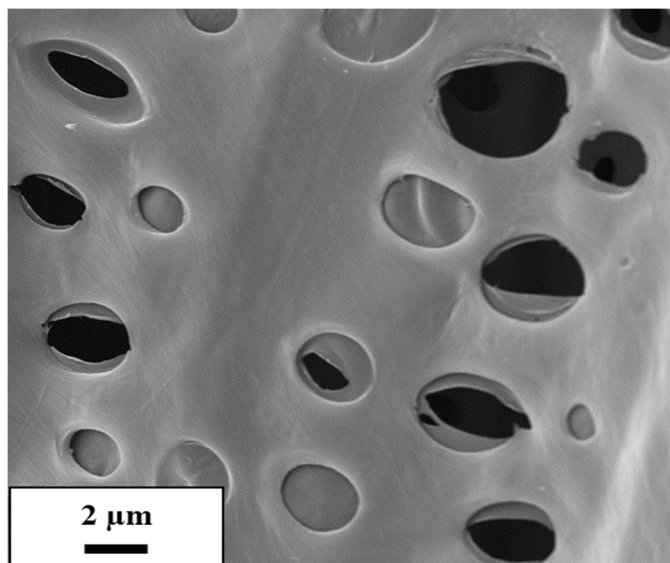

**Figure S3** Cross-sectional SEM images of Fe<sub>3</sub>C/N-C.

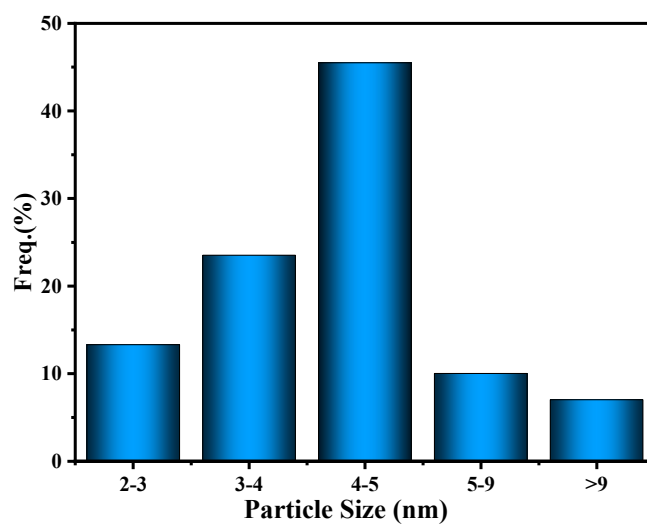

**Figure S4** Nanoparticle size distribution of Fe<sub>3</sub>C/N-C based on the TEM image in Figure 1.

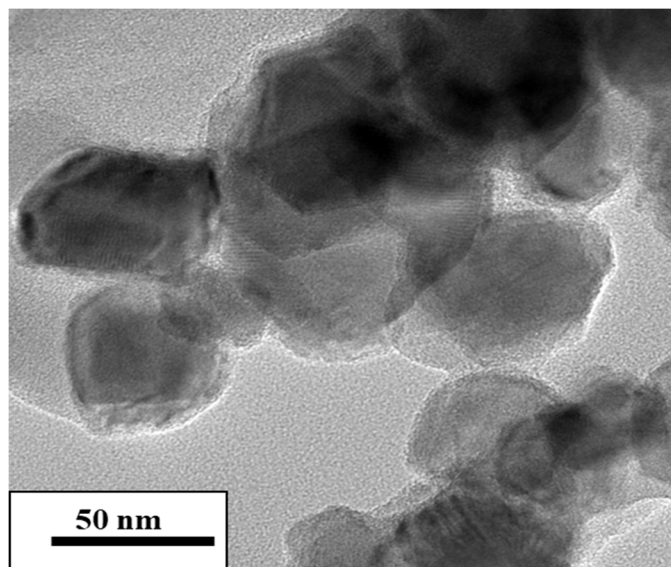

**Figure S5** TEM image of  $\text{Fe}_3\text{C-C}$  when PIL wasn't used to disperse iron source and the agglomeration of big iron carbide particles was observed.

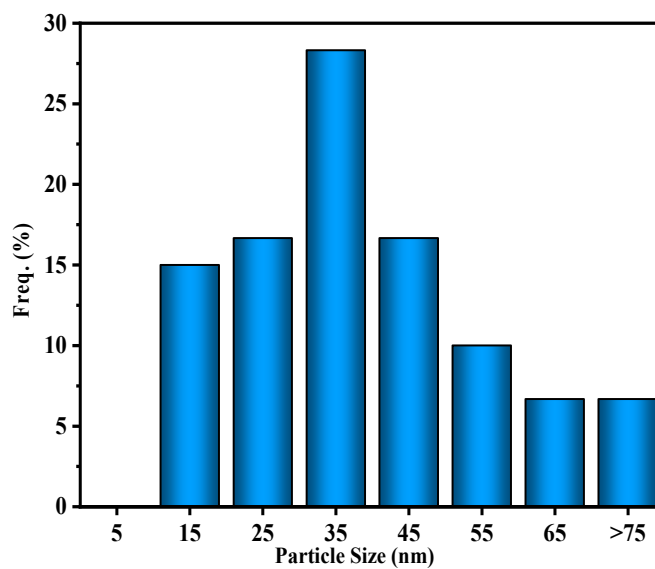

**Figure S6** Particle size distribution of  $\text{Fe}_3\text{C-C}$  when PIL wasn't used to disperse iron source.

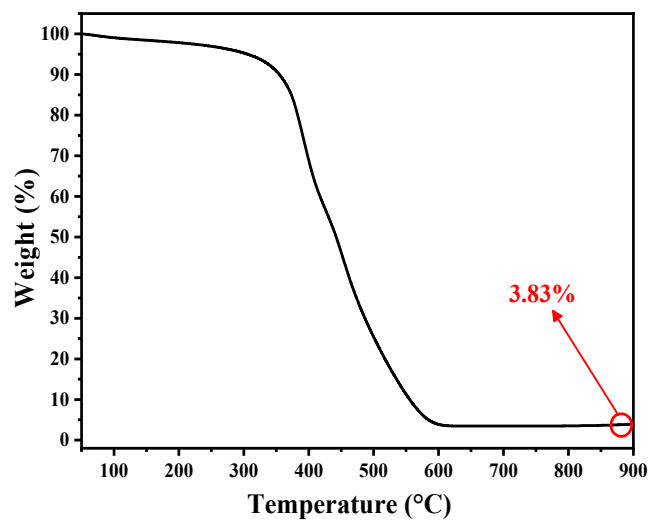

**Figure S7** TGA curve of Fe<sub>3</sub>C/N-C under air.

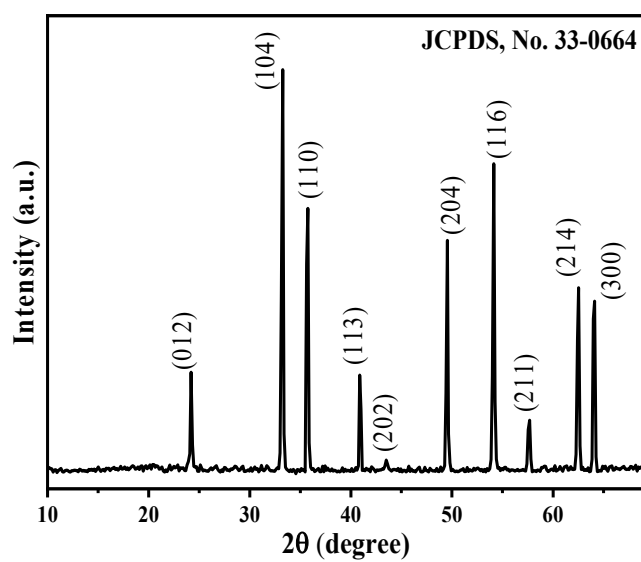

**Figure S8** PXRD diagram of the TGA residue of Fe<sub>3</sub>C/N-C after heating to 900 °C in air, indicative of an α-Fe<sub>2</sub>O<sub>3</sub> phase.

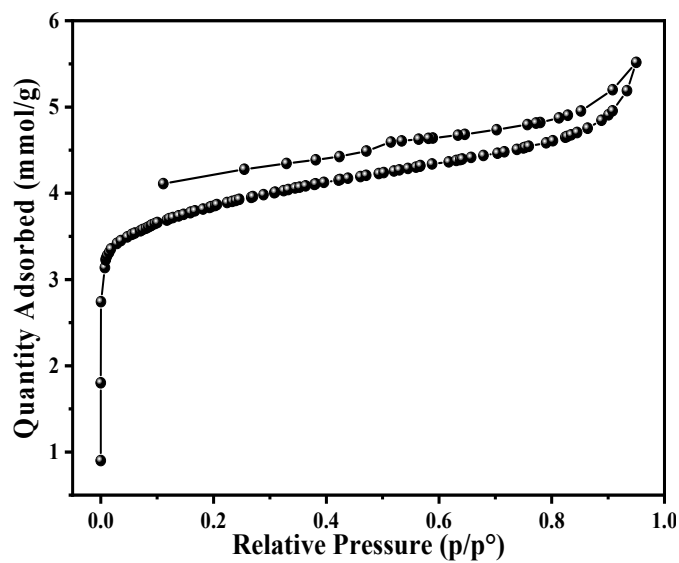

**Figure S9** Nitrogen sorption isotherm of Fe<sub>3</sub>C/N-C measured at 77 K.

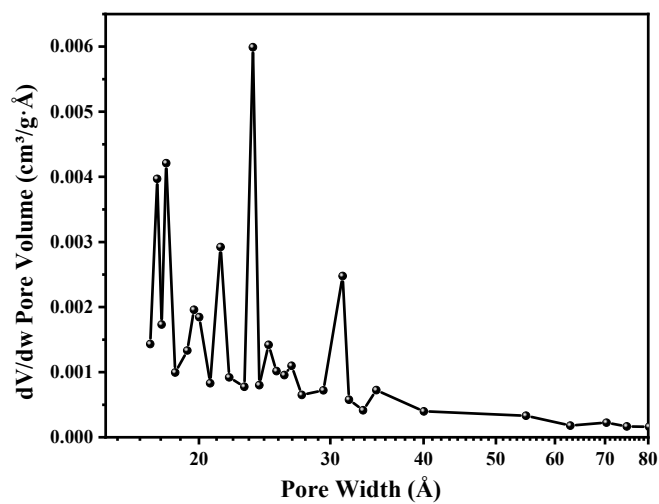

**Figure S10** Pore size distribution plot of Fe<sub>3</sub>C/N-C.

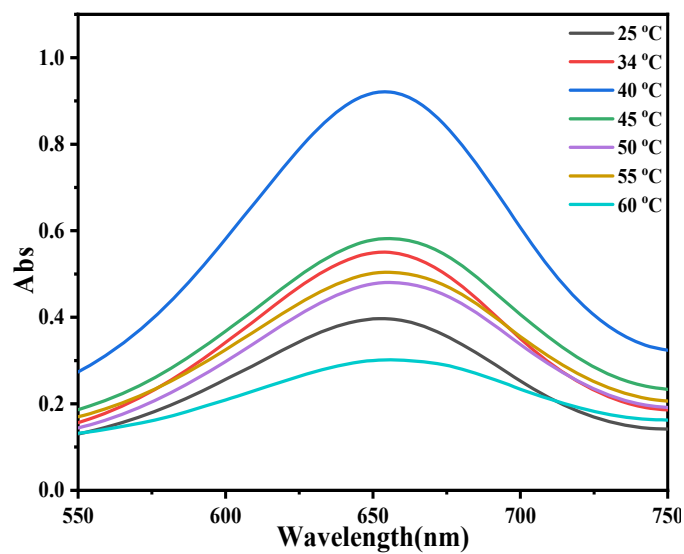

**Figure S11** Temperature dependence plot of the peroxidase-like activity of the obtained  $\text{Fe}_3\text{C}/\text{N}-\text{C}$  catalyst.

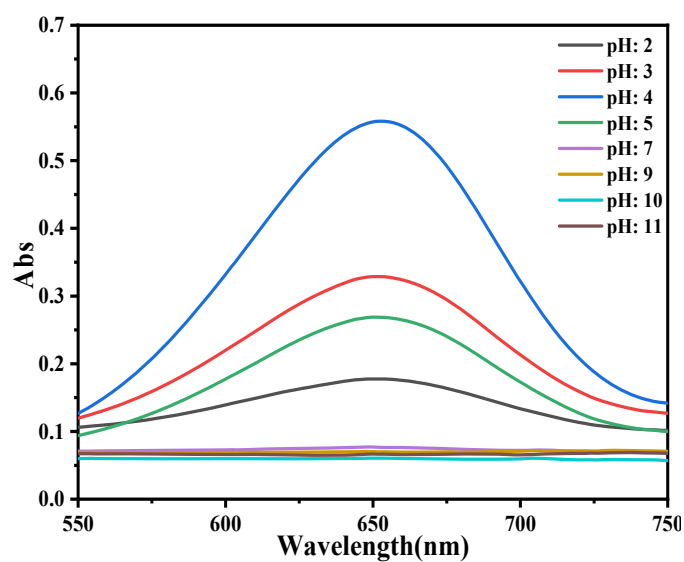

**Figure S12** Dependence of the peroxidase-like activity of the obtained  $\text{Fe}_3\text{C}/\text{N}-\text{C}$  catalyst on pH.

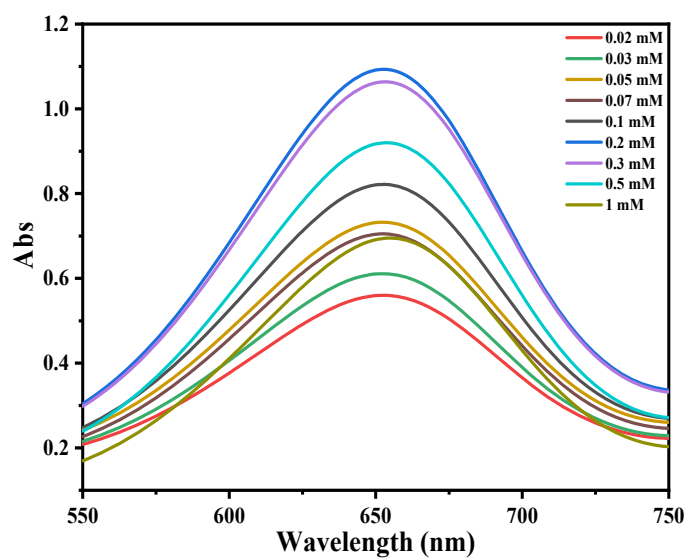

**Figure S13** Dependence of the peroxidase-like activity of the obtained  $\text{Fe}_3\text{C/N-C}$  catalyst on TMB concentration.

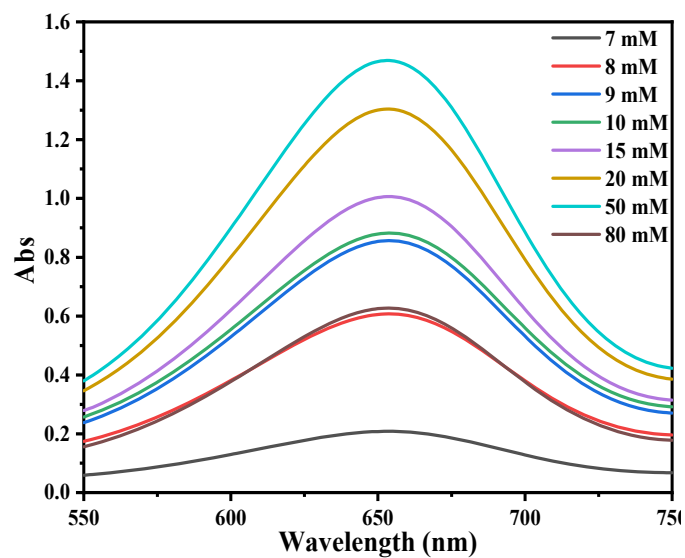

**Figure S14** Dependence of the peroxidase-like activity of the obtained  $\text{Fe}_3\text{C/N-C}$  catalyst on  $\text{H}_2\text{O}_2$  concentration



**Table S1** Comparison of the apparent Michaelis constant ( $K_m$ ) and maximum reaction rate ( $V_{max}$ ) between our work and other groups' work.

| Catalyst                                                    | Substrate                                       | $K_m$ (mM)                 | $V_{max}$ ( $10^{-8}$ M s $^{-1}$ ) | Reference        |
|-------------------------------------------------------------|-------------------------------------------------|----------------------------|-------------------------------------|------------------|
| Fe <sub>3</sub> O <sub>4</sub>                              | TMB<br>H <sub>2</sub> O <sub>2</sub>            | 0.098<br>154               | 3.44<br>9.78                        | [1]              |
| Au/Co <sub>3</sub> O <sub>4</sub> -<br>CeO <sub>x</sub> NCs | TMB<br>H <sub>2</sub> O <sub>2</sub>            | 0.1219<br>0.2724           | 0.8577<br>0.3898                    | [2]              |
| WSe <sub>2</sub><br>nanosheets                              | TMB<br>H <sub>2</sub> O <sub>2</sub>            | 0.433<br>19.53             | 1.43<br>2.22                        | [3]              |
| Fe <sub>3</sub> C/NGr                                       | TMB<br>H <sub>2</sub> O <sub>2</sub>            | 0.25<br>38.42              | 8.26<br>13.06                       | [4]              |
| AKCN                                                        | TMB<br>H <sub>2</sub> O <sub>2</sub>            | 0.60<br>0.79               | 6.78<br>2.53                        | [5]              |
| HRP                                                         | TMB<br>H <sub>2</sub> O <sub>2</sub>            | 0.41<br>0.74               | 1.12<br>1.11                        | [4]              |
| Fe <sub>3</sub> C/N-C                                       | <b>TMB</b><br><b>H<sub>2</sub>O<sub>2</sub></b> | <b>0.033</b><br><b>4.9</b> | <b>4.2</b><br><b>3.84</b>           | <b>This work</b> |

**Table S2** Analytical characteristics of different colorimetric AA measuring system.

| Catalyst                     | LOD ( $\mu$ M) | Range                         | Reference        |
|------------------------------|----------------|-------------------------------|------------------|
| MOF-808                      | 15             | 30-1030 $\mu$ M               | [6]              |
| MIL-68                       | 6              | 30-485 $\mu$ M                | [7]              |
| MIL-53(Fe)                   | 15             | 28.6-190.5 $\mu$ M            | [8]              |
| CNT                          | 20             | 80-136 $\mu$ M                | [9]              |
| SQE                          | 10             | 50-425 $\mu$ M                | [10]             |
| Silver nanoparticles (AgNPs) | 82.8           | 1-4 mM                        | [11]             |
| MoO <sub>3</sub>             | 90             | 1-100 mM                      | [12]             |
| Fe <sub>3</sub> C/N-C        | <b>2.64</b>    | <b>2-50 <math>\mu</math>M</b> | <b>This work</b> |

## References

1. Gao, L.; Zhuang, J.; Nie, L.; Zhang, J.; Zhang, Y.; Gu, N.; Wang, T.; Feng, J.; Yang, D.; Perrett, S.; et al. Intrinsic Peroxidase-like Activity of Ferromagnetic Nanoparticles. *Nat. Nanotechnol.* **2007**, *2*, 577–583, doi:10.1038/nnano.2007.260.
2. Liu, H.; Ding, Y.; Yang, B.; Liu, Z.; Liu, Q.; Zhang, X. Colorimetric and Ultrasensitive Detection of H<sub>2</sub>O<sub>2</sub> Based on Au/Co<sub>3</sub>O<sub>4</sub>-CeO<sub>x</sub> Nanocomposites with Enhanced Peroxidase-like Performance. *Sensors Actuators, B Chem.* **2018**, *271*, 336–345, doi:10.1016/j.snb.2018.05.108.
3. Chen, T.M.; Wu, X.J.; Wang, J.X.; Yang, G.W. WSe<sub>2</sub> Few Layers with Enzyme Mimic Activity for High-Sensitive and High-Selective Visual Detection of Glucose. *Nanoscale* **2017**, *9*, 11806–11813, doi:10.1039/c7nr03179c.
4. Wu, S.; Huang, H.; Feng, X.; Du, C.; Song, W. Facile Visual Colorimetric Sensor Based on Iron Carbide Nanoparticles Encapsulated in Porous Nitrogen-Rich Graphene. *Talanta* **2017**, *167*, 385–391, doi:10.1016/j.talanta.2017.02.003.
5. Zhang, P.; Sun, D.; Cho, A.; Weon, S.; Lee, S.; Lee, J.; Han, J.W.; Kim, D.P.; Choi, W. Modified Carbon Nitride Nanozyme as Bifunctional Glucose Oxidase-Peroxidase for Metal-Free Bioinspired Cascade Photocatalysis. *Nat. Commun.* **2019**, *10*, 1–14, doi:10.1038/s41467-019-08731-y.
6. Zheng, H.Q.; Liu, C.Y.; Zeng, X.Y.; Chen, J.; Lü, J.; Lin, R.G.; Cao, R.; Lin, Z.J.; Su, J.W. MOF-808: A Metal-Organic Framework with Intrinsic Peroxidase-Like Catalytic Activity at Neutral PH for Colorimetric Biosensing. *Inorg. Chem.* **2018**, *57*, 9096–9104, doi:10.1021/acs.inorgchem.8b01097.

7. Zhang, J.W.; Zhang, H.T.; Du, Z.Y.; Wang, X.; Yu, S.H.; Jiang, H.L. Water-Stable Metal–Organic Frameworks with Intrinsic Peroxidase-like Catalytic Activity as a Colorimetric Biosensing Platform. *Chem. Commun.* **2014**, *50*, 1092–1094, doi:10.1039/c3cc48398c.
8. Ai, L.; Li, L.; Zhang, C.; Fu, J.; Jiang, J. MIL-53(Fe): A Metal-Organic Framework with Intrinsic Peroxidase-like Catalytic Activity for Colorimetric Biosensing. *Chem. - A Eur. J.* **2013**, *19*, 15105–15108, doi:10.1002/chem.201303051.
9. Wang, Z.; Liu, J.; Liang, Q.; Wang, Y.; Luo, G. Carbon Nanotube-Modified Electrodes for the Simultaneous Determination of Dopamine and Ascorbic Acid. *Analyst* **2002**, *127*, 653–658, doi:10.1039/b201060g.
10. Alizadeh, N.; Ghasemi, F.; Salimi, A.; Hallaj, R.; Fathi, F.; Soleimani, F. Polymer Nanocomposite Film for Dual Colorimetric and Fluorescent Ascorbic Acid Detection Integrated Single-Cell Bioimaging with Droplet Microfluidic Platform. *Dye. Pigment.* **2020**, *173*, 107875, doi:10.1016/j.dyepig.2019.107875.
11. Ferreira, D.C.M.; Giordano, G.F.; Soares, C.C.D.S.P.; De Oliveira, J.F.A.; Mendes, R.K.; Piazzetta, M.H.; Gobbi, A.L.; Cardoso, M.B. Optical Paper-Based Sensor for Ascorbic Acid Quantification Using Silver Nanoparticles. *Talanta* **2015**, *141*, 188–194, doi:10.1016/j.talanta.2015.03.067.
12. Li, R.; An, H.; Huang, W.; He, Y. Molybdenum Oxide Nanosheets Meet Ascorbic Acid: Tunable Surface Plasmon Resonance and Visual Colorimetric Detection at Room Temperature. *Sensors Actuators, B Chem.* **2018**, *259*, 59–63, doi:10.1016/j.snb.2017.12.058.
